# Supplementary material
Source: MDPI journal article supplement (https://www.mdpi.com/2076-0760/13/5/273)
Supplement: s1 [file s1]

## Supplementary material

**Figure S1:** Measurement Model for Objective and Subjective SES Latent Constructs

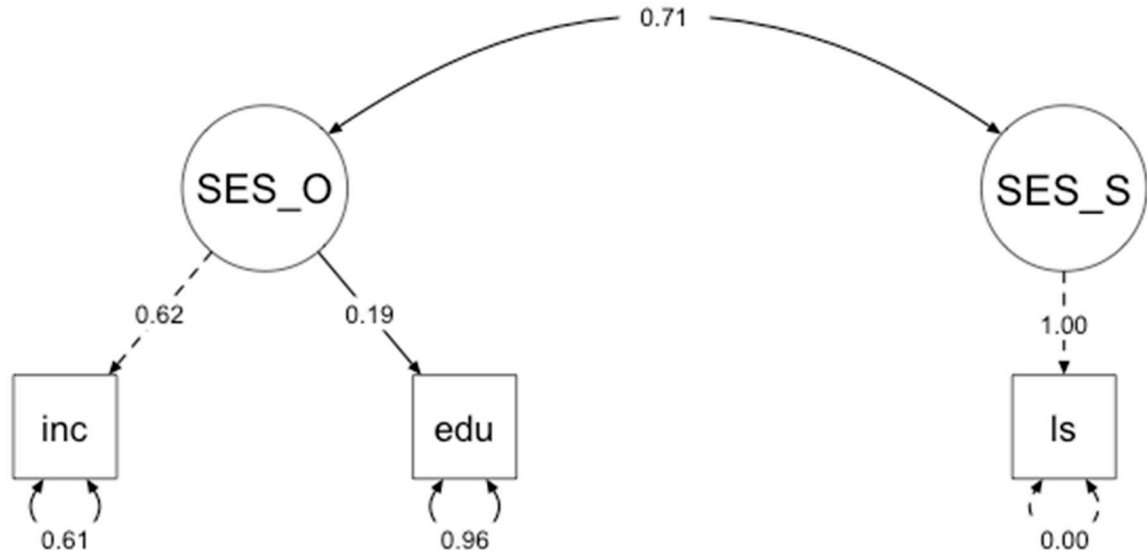

*Note.* Standardized coefficients are presented. SES\_O, objective SES; SES\_S, subjective SES; inc, income; edu, education; ls, life standards.

**Figure S2:** Measurement Model for Self and Collective Efficacy Latent Construct (7 items)

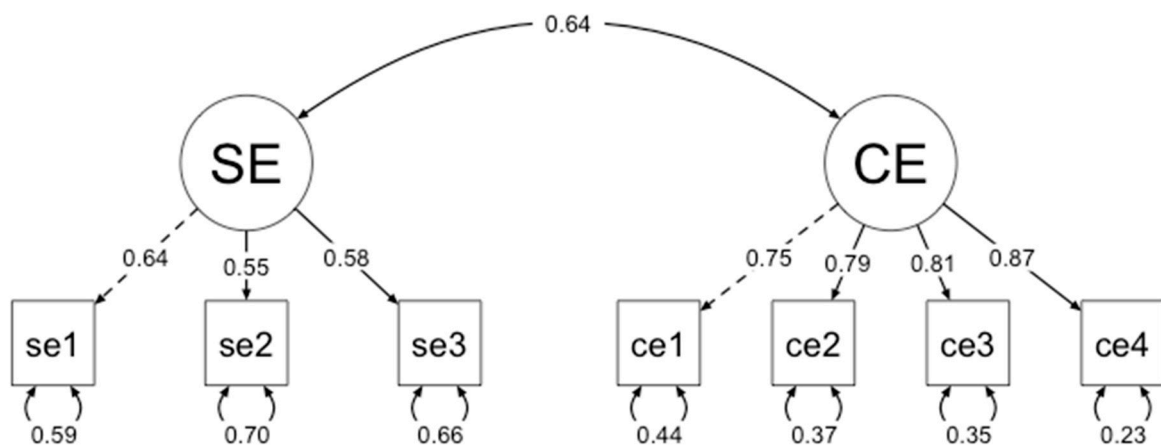

*Note.* Standardized coefficients are presented. SE, self-efficacy; CE, collective efficacy

**Figure S3:** Measurement Model for Self and Collective Efficacy Latent Constructs (6 items)

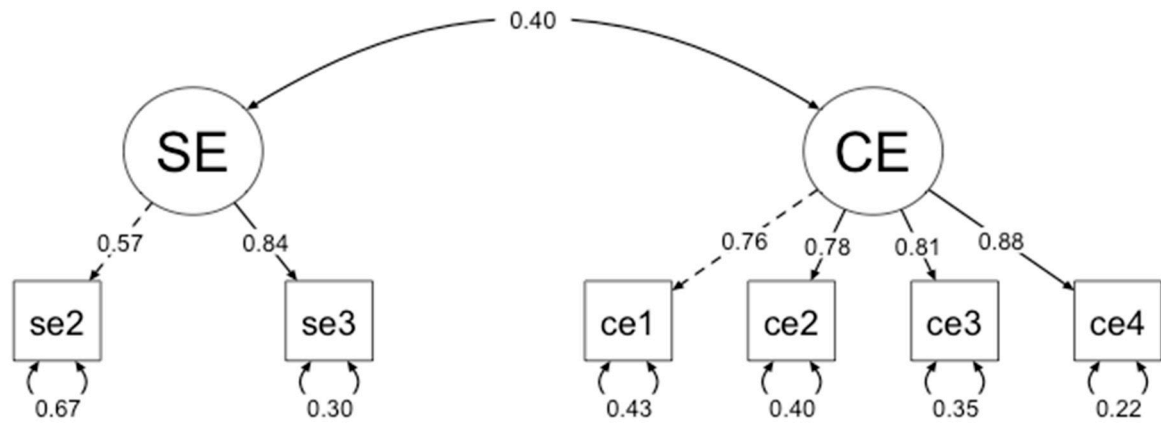

*Note.* Standardized coefficients are presented. SE, self-efficacy; CE, collective efficacy.

**Figure S4:** Measurement Model for the Eight-item Pro-environmental Behavior Latent Construct

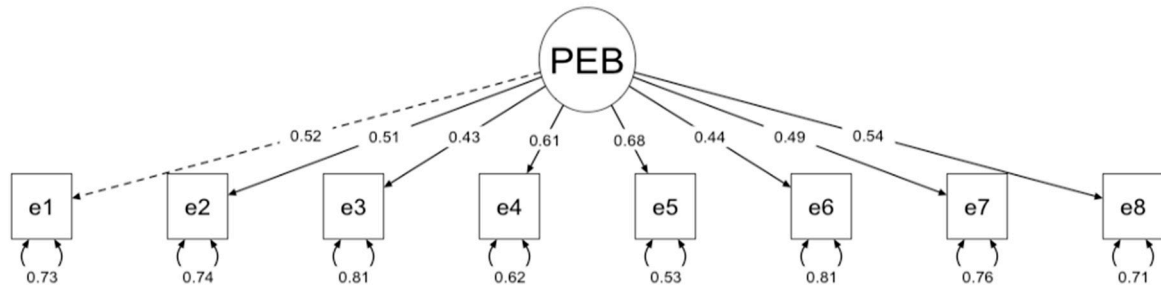

*Note.* Standardized coefficients are presented. PEB, pro-environmental behavior.

**Figure S5:** Measurement Model for the Three-item Pro-environmental Behavior Latent Construct

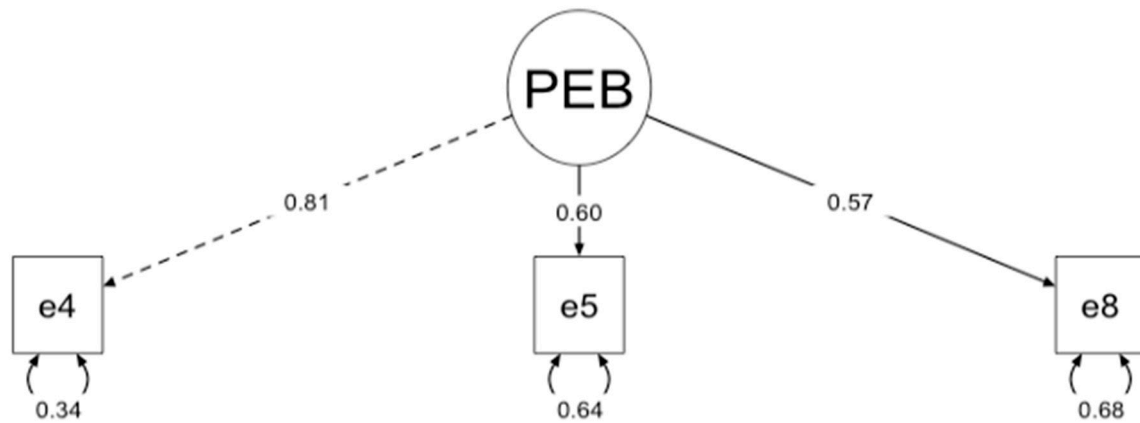

*Note.* Standardized coefficients are presented. PEB, pro-environmental behavior.

**Figure S6:** Parameter Estimates of the Narrower Full SEM Mediation Model

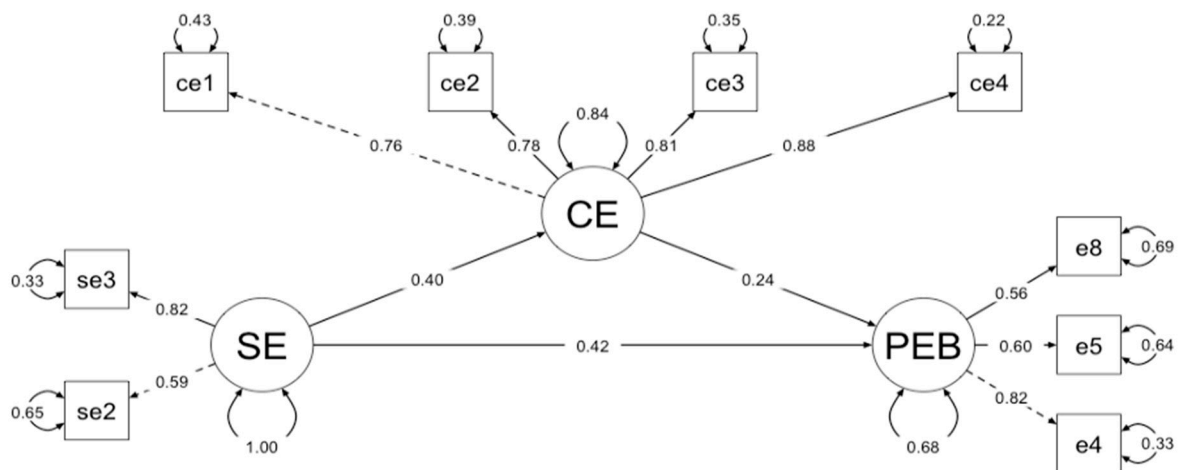

*Note.* Standardized coefficients are presented. SE, self-efficacy; CE, collective efficacy; PEB, pro-environmental behavior.
